# Supplementary material for: Short and medium-term outcomes in individuals hospitalized with acute myocardial infarction and multiple chronic conditions: The Worcester heart attack study
Source: PubMed Central journal article supplement — J Multimorb Comorb. 2024 Mar 27;14:26335565241242279. doi: 10.1177/26335565241242279 (PMC10976488; doi:10.1177/26335565241242279), 2024-03-27
Supplement: sj-pdf-1-cob-10.1177_26335565241242279.pdf [file sj-pdf-1-cob-10.1177_26335565241242279.pdf]

Table A: ICD-9 Codes for the 12-chronic conditions included in “Short and medium-term outcomes in individuals hospitalized with acute myocardial infarction and multiple chronic conditions: the Worcester Heart Attack Study”

| <b>Comorbidity</b>                          | <b>ICD-9 codes</b>                                                                                                                                                                  |
|---------------------------------------------|-------------------------------------------------------------------------------------------------------------------------------------------------------------------------------------|
| Anemia                                      | 280.X; 281.X; 282.X; 283.X; 284.X; 285.X                                                                                                                                            |
| Atrial Fibrillation                         | 427.31; 427.32                                                                                                                                                                      |
| Chronic kidney disease                      | 585.1; 585.2; 585.3; 585.4; 585.5; 585.6; 585.9                                                                                                                                     |
| Chronic obstructive pulmonary disease(COPD) | 490;491;492; 493;494; 495; 496; 518                                                                                                                                                 |
| Dementia                                    | 290.X; 294.X; 331.X                                                                                                                                                                 |
| Depression                                  | 296.X; 300.4; 301.12;311                                                                                                                                                            |
| Diabetes                                    | 250.X                                                                                                                                                                               |
| Heart failure                               | 398.91;402.1;402.11;402.91; 404.01;404.03; 404.11, 404.13, 404.91, 404.93, 428.0, 428.1, 428.21,428.22, 428.23, 428.30, 428.31, 428.32, 428.33, 428.40,428.41, 428.42, 428.43,428.9 |
| Hyperlipidemia                              | 272.x                                                                                                                                                                               |
| Hypertension                                | 401.X; 402.X; 403.X; 404.X; 405.X                                                                                                                                                   |
| Peripheral vascular disease                 | 440.X; 441.X; 445.X                                                                                                                                                                 |
| Stroke                                      | 430; 431; 432;433; 434; 435; 436; 438                                                                                                                                               |
